# Supplementary material
Source: PubMed Central journal article supplement (PMC3754574)
Supplement: JB.00309-13_zjb999092729so1.pdf [file JB.00309-13_zjb999092729so1.pdf]

Supplement to “Isolation and Characterization of Mutant *Sinorhizobium meliloti* NodD1  
Proteins With Altered Responses to Luteolin” by Melicent C. Peck<sup>a</sup>, Robert F. Fisher<sup>b,#</sup>,  
Robert Bliss<sup>c</sup>, and Sharon R. Long<sup>b,#</sup>

Department of Medicine<sup>a</sup>, Division of Infectious Diseases, University of California, San  
Francisco, California 94143

Department of Biology<sup>b</sup>, Stanford University, Stanford, California 94305

Department of Biochemistry and Biophysics<sup>c</sup>, Texas A&M University, College Station,  
Texas 77843



**Figure S1.** Locations of mutant residues based on structural and functional studies in LTTRs: *S. meliloti* NodD1 (1), *R. l. bv viciae* NodD (2, 3) (Peck and Long, unpublished data), *R. l. bv trifolii* NodD (4) (Peck and Long, unpublished data), *Burkholderia sp.* DntR (5), *P. putida* NahR (6) (7), *E.coli* XapR (8), *C. testosteroni* T-2 Tsar (9, 10), *A. tumefaciens* OccR (11) (12), *C. freundii* AmpR (13, 14), *E. coli* OxyR (15) (16, 17), *R. sphaeroides* CbbR (18), *A. baylyi* BenM (19) (20), *E.coli* Cbl (21) (22), and *S. typhimurium* CysB (23). Numbers to the right indicate amino acid residue. Residues shaded yellow are identical to *S. meliloti* NodD1. Outlined residues indicate the following mutant phenotypes based on mutations in LTTRs: green: activation-deficient except in Cbl in which mutants are unable to repress target transcription; red: constitutively-active; purple: enhanced inducer sensitivity. Mutant phenotypes based on LTTR crystal structures: orange: oligomerization; grey: ligand binding (i.e., lining the inducer binding pocket or contacting the ligand). Boxed areas indicate mutational hotspots at sites of mutant residues discussed in this study.

**TABLE S1. Strains and Plasmids**

| <b>Strain or Plasmid</b> | <b>Relevant Characteristics</b>                                                                                                                                                             | <b>Source/Reference</b> |
|--------------------------|---------------------------------------------------------------------------------------------------------------------------------------------------------------------------------------------|-------------------------|
| <i>Strains</i>           |                                                                                                                                                                                             |                         |
| DH5 $\alpha$             | <i>Escherichia coli supE44 <math>\Delta</math>lacU169 (<math>\Phi</math>80lacZ<math>\Delta</math>M15) hsdR17<br/><i>recA1 endA1 gyrA96 thi-1 relA1</i></i>                                  | (24)                    |
| XL1-Red                  | $\Delta$ [ <i>mcrA</i> ] <i>183</i> , $\Delta$ [ <i>mcrCB-hsdSMR-mrr</i> ] <i>173</i> , <i>endA1, supE44, thi-1,</i><br><i>gyrA96, relA1, mutS, mutT, mutD5, lac Tn10 (Tet<sup>R</sup>)</i> | Stratagene              |
| XL1-Red Tc <sup>S</sup>  | $\Delta$ [ <i>mcrA</i> ] <i>183</i> , $\Delta$ [ <i>mcrCB-hsdSMR-mrr</i> ] <i>173</i> , <i>endA1, supE44, thi-1,</i><br><i>gyrA96, relA1, mutS, mutT, mutD5, lac Tc<sup>S</sup></i>         | This study              |
| Rm 1021                  | <i>Sinorhizobium meliloti</i> SU47 str-21 Sm <sup>R</sup>                                                                                                                                   | (25)                    |
| A2105                    | Rm1021 <i>nodD1::Tn5(9B7) nodD2::tm nodD3::sp/g-1 nodC'-lacZ</i>                                                                                                                            | (26)                    |
| BTH101                   | F', <i>cya-99, araD139, galE15, galK16, rpsL1(Str<sup>R</sup>), hsdR2, mcrA1,</i><br><i>mcrB1</i>                                                                                           | (27)                    |
| <i>Plasmids</i>          |                                                                                                                                                                                             |                         |
| pASK75B                  | Vector encoding 10 amino-acid Strep-tag, Tc-inducible promoter                                                                                                                              | (28)                    |
| pUC119                   | Cloning vector, Ap <sup>R</sup>                                                                                                                                                             | (29)                    |
| pBluescript SK           | Cloning vector, Ap <sup>R</sup>                                                                                                                                                             | Stratagene              |
| pCRII-TOPO               | TOPO Cloning vector, Ap <sup>R</sup>                                                                                                                                                        | Invitrogen              |
| pGroESL                  | <i>E. coli groESL</i> in pTG10                                                                                                                                                              | (30)                    |
| pKT25                    | <i>B. pertussis cya</i> T25-expression plasmid, Kn <sup>R</sup>                                                                                                                             | (27)                    |
| pKT25-zip                | <i>B. pertussis cya</i> T25-leucine zipper fusion, Kn <sup>R</sup>                                                                                                                          | (27)                    |
| pUT18                    | <i>B. pertussis cya</i> T18-expression plasmid, Ap <sup>R</sup>                                                                                                                             | (27)                    |

|            |                                                                    |            |
|------------|--------------------------------------------------------------------|------------|
| pUT18c-zip | <i>B. pertussis cya</i> T18-leucine zipper fusion, Ap <sup>R</sup> | (27)       |
| pNodD1-ST  | C-terminal fusion of NodD1 to Strep-tag in pASK75B                 | (31)       |
| pMP40      | C-terminal fusion of NodD1 D284N to Strep-tag in pASK75B           | This study |
| pMP41      | C-terminal fusion of NodD1 K205N to Strep-tag in pASK75B           | This study |
| pMP42      | C-terminal fusion of NodD1 L280F to Strep-tag in pASK75B           | This study |
| pMP43      | C-terminal fusion of NodD1 L69F to Strep-tag in pASK75B            | This study |
| pMP44      | C-terminal fusion of NodD1 S104L to Strep-tag in pASK75B           | This study |
| pMP45      | C-terminal fusion of NodD1 D134N to Strep-tag in pASK75B           | This study |
| pMP46      | C-terminal fusion of NodD1 M193I to Strep-tag in pASK75B           | This study |
| pMP50      | <i>S. meliloti nodD1</i> in pCRII                                  | This study |
| pMP60      | <i>S. meliloti nodD1</i> D284N in pCRII                            | This study |
| pMP61      | <i>S. meliloti nodD1</i> K205N in pCRII                            | This study |
| pMP62      | <i>S. meliloti nodD1</i> L280F in pCRII                            | This study |
| pMP63      | <i>S. meliloti nodD1</i> D284A in pCRII                            | This study |
| pMP64      | <i>S. meliloti nodD1</i> L280A in pCRII                            | This study |
| pMP66      | <i>S. meliloti nodD1</i> P285A in pCRII                            | This study |
| pMP67      | <i>S. meliloti nodD1</i> P285Q in pCRII                            | This study |
| pMP68      | <i>S. meliloti nodD1</i> G286A in pCRII                            | This study |
| pMP69      | <i>S. meliloti nodD1</i> P285Q G286A in pCRII                      | This study |
| pMP70      | <i>S. meliloti nodD1</i> K205A in pCRII                            | This study |
| pMP86      | <i>S. meliloti nodD1</i> M193I in pCRII                            | This study |
| pAB 100    | <i>S. meliloti nodD1</i> L69F in pCRII                             | This study |
| pAB 101    | <i>S. meliloti nodD1</i> L103F in pCRII                            | This study |
| pAB 102    | <i>S. meliloti nodD1</i> S104L in pCRII                            | This study |
| pAB 103    | <i>S. meliloti nodD1</i> D134N in pCRII                            | This study |
| pAB 104    | <i>S. meliloti nodD1</i> D135N in pCRII                            | This study |
| pRF796     | <i>S. meliloti nodF nod</i> box in pCRII                           | This study |
| pRF1049    | NodD1-T18 fusion in pUT18, Ap <sup>R</sup>                         | This study |

|                                  |                                                                           |            |
|----------------------------------|---------------------------------------------------------------------------|------------|
| pRF1050                          | T18-NodD1 fusion in pUT18c, Ap <sup>R</sup>                               | This study |
| pRF1051                          | T25-NodD1 fusion in pKT25, Kn <sup>R</sup>                                | This study |
| pRF1099                          | NodD1 L69F -T18 fusion in pUT18, Ap <sup>R</sup>                          | This study |
| pRF1101                          | NodD1 S104L -T18 fusion in pUT18, Ap <sup>R</sup>                         | This study |
| pRF1104                          | NodD1 M193I -T18 fusion in pUT18, Ap <sup>R</sup>                         | This study |
| pRF1105                          | NodD1 K205N -T18 fusion in pUT18, Ap <sup>R</sup>                         | This study |
| pRF1107                          | NodD1 D284N -T18 fusion in pUT18, Ap <sup>R</sup>                         | This study |
| pRF1108                          | T25-NodD1 S104L fusion in pKT25, Kn <sup>R</sup>                          | This study |
| pRF1113                          | T25-NodD1 L280F fusion in pKT25, Kn <sup>R</sup>                          | This study |
| pRF1114                          | T25-NodD1 D284N fusion in pKT25, Kn <sup>R</sup>                          | This study |
| pRF1115                          | NodD1 L103F -T18 fusion in pUT18, Ap <sup>R</sup>                         | This study |
| pRF1117                          | NodD1 L280F -T18 fusion in pUT18, Ap <sup>R</sup>                         | This study |
| pRF1119                          | T25-NodD1 L69F fusion in pKT25, Kn <sup>R</sup>                           | This study |
| pRF1120                          | T25-NodD1 K205N fusion in pKT25, Kn <sup>R</sup>                          | This study |
| pRF1134                          | T25-NodD1 M193I fusion in pKT25, Kn <sup>R</sup>                          | This study |
| pRF1138                          | T25-NodD1 L103F fusion in pKT25, Kn <sup>R</sup>                          | This study |
| pRF1145                          | NodD1 D134N/D135N -T18 fusion in pUT18, Ap <sup>R</sup>                   | This study |
| pRF1151                          | NodD1 L103F/S104L -T18 fusion in pUT18, Ap <sup>R</sup>                   | This study |
| pRF1153                          | T25-NodD1 L103F/S104L fusion in pKT25, Kn <sup>R</sup>                    | This study |
| pRF1155                          | T25-NodD1 D134N/D135N fusion in pKT25, Kn <sup>R</sup>                    | This study |
| pRF1151                          | NodD1 L103F/S104L -T18 fusion in pUT18, Ap <sup>R</sup>                   | This study |
| pRF1161                          | NodD1 (BglII/BamHIA)-T18 fusion in pUT18, Ap <sup>R</sup>                 | This study |
| pRF1163                          | T25-NodD1 (BglII/BamHIA) fusion in pKT25, Kn <sup>R</sup>                 | This study |
| <i>Broad host-range plasmids</i> |                                                                           |            |
| pRK2013                          | RK2 derivative helper plasmid, Kn <sup>R</sup>                            | (32)       |
| pTE3                             | IncP cloning vector, Tc <sup>R</sup> , <i>S. typhimurium trp</i> promoter | (1)        |
| pRF771                           | pTE3 with modified polylinker                                             | (33)       |
| pRmE43                           | <i>nodD1</i> in pTE3, Tc <sup>R</sup>                                     | (34) (35)  |

|         |                                                |            |
|---------|------------------------------------------------|------------|
| pMP53   | <i>S. meliloti nodd1</i> in pRF771             | This study |
| pMP150  | <i>S. meliloti nodd1</i> D284N in pRF771       | This study |
| pMP151  | <i>S. meliloti nodd1</i> K205N in pRF771       | This study |
| pMP152  | <i>S. meliloti nodd1</i> L280F in pRF771       | This study |
| pMP153  | <i>S. meliloti nodd1</i> D284A in pRF771       | This study |
| pMP154  | <i>S. meliloti nodd1</i> L280A in pRF771       | This study |
| pMP156  | <i>S. meliloti nodd1</i> P285A in pRF771       | This study |
| pMP157  | <i>S. meliloti nodd1</i> P285Q in pRF771       | This study |
| pMP158  | <i>S. meliloti nodd1</i> G286A in pRF771       | This study |
| pMP159  | <i>S. meliloti nodd1</i> P285Q/G286A in pRF771 | This study |
| pMP160  | <i>S. meliloti nodd1</i> K205A pRF771          | This study |
| pMP173  | <i>S. meliloti nodd1</i> M193I pRF771          | This study |
| pAB 110 | <i>S. meliloti nodd1</i> L69F pRF771           | This study |
| pAB 111 | <i>S. meliloti nodd1</i> L103F pRF771          | This study |
| pAB 112 | <i>S. meliloti nodd1</i> S104L pRF771          | This study |
| pAB 113 | <i>S. meliloti nodd1</i> D134N pRF771          | This study |
| pAB 114 | <i>S. meliloti nodd1</i> D135N pRF771          | This study |

**Table S2. Dimerization of NodD1 mutants**

|    | T18 fusion          | T25 fusion          | $\beta$ -gal <sup>a</sup> | SD    |
|----|---------------------|---------------------|---------------------------|-------|
| 1  | D1(L69F)-T18        | T25-zip             | 26.2                      | 9.2   |
| 2  | D1(L69F)-T18        | T25-D1              | 540.3                     | 59.5  |
| 3  | D1(L69F)-T18        | T25-D1(L69F)        | 657.7                     | 118.6 |
| 4  | D1-T18              | T25-D1(L69F)        | 356.1                     | 125.2 |
| 5  | T18-zip             | T25-D1(L69F)        | 27.6                      | 9.5   |
| 6  | T18 vector          | T25-D1(L69F)        | 27.5                      | 18.9  |
| 7  | D1(L103F/S104L)-T18 | T25-zip             | 29.1                      | 7.7   |
| 8  | D1(L103F/S104L)-T18 | T25-D1              | 413.8                     | 122.9 |
| 9  | D1(L103F/S104L)-T18 | T25-D1(L103F/S104L) | 728.7                     | 90.8  |
| 10 | D1-T18              | T25-D1(L103F/S104L) | 302.6                     | 105.3 |
| 11 | T18-zip             | T25-D1(L103F/S104L) | 27.6                      | 4.3   |
| 12 | T18 vector          | T25-D1(L103F/S104L) | 29.5                      | 4.8   |
| 13 | D1(D134N/D135N)-T18 | T25-zip             | 27.0                      | 8.6   |
| 14 | D1(D134N/D135N)-T18 | T25-D1              | 712.9                     | 103.3 |
| 15 | D1(D134N/D135N)-T18 | T25-D1(D134N/D135N) | 818.0                     | 104.2 |
| 16 | D1-T18              | T25-D1(D134N/D135N) | 396.9                     | 40.0  |
| 17 | T18-zip             | T25-D1(D134N/D135N) | 34.1                      | 8.8   |
| 18 | T18 vector          | T25-D1(D134N/D135N) | 23.1                      | 9.5   |
| 19 | D1(M193I)-T18       | T25-zip             | 25.1                      | 10.2  |
| 20 | D1(M193I)-T18       | T25-D1              | 570.7                     | 47.9  |
| 21 | D1(M193I)-T18       | T25-D1(M193I)       | 534.0                     | 40.7  |
| 22 | D1-T18              | T25-D1(M193I)       | 387.3                     | 56.6  |
| 23 | T18-zip             | T25-D1(M193I)       | 51.4                      | 28.5  |
| 24 | T18 vector          | T25-D1(M193I)       | 14.1                      | 7.5   |
| 25 | D1(K205N)-T18       | T25-zip             | 26.0                      | 32.5  |
| 26 | D1(K205N)-T18       | T25-D1              | 562.4                     | 180.8 |
| 27 | D1(K205N)-T18       | T25-D1(K205N)       | 709.1                     | 138.5 |
| 28 | D1-T18              | T25-D1(K205N)       | 459.2                     | 227.7 |
| 29 | T18-zip             | T25-D1(K205N)       | 108.5                     | 59.0  |
| 30 | T18 vector          | T25-D1(K205N)       | 12.1                      | 11.6  |
| 31 | D1(L280F)-T18       | T25-zip             | 16.6                      | 22.5  |
| 32 | D1(L280F)-T18       | T25-D1              | 627.0                     | 154.5 |
| 33 | D1(L280F)-T18       | T25-D1(L280F)       | 774.9                     | 143.0 |
| 34 | D1-T18              | T25-D1(L280F)       | 263.7                     | 116.0 |
| 35 | T18-zip             | T25-D1(L280F)       | 30.4                      | 21.1  |
| 36 | T18 vector          | T25-D1(L280F)       | 20.1                      | 8.5   |
| 37 | D1(D284N)-T18       | T25-zip             | 26.3                      | 16.4  |
| 38 | D1(D284N)-T18       | T25-D1              | 579.2                     | 110.2 |
| 39 | D1(D284N)-T18       | T25-D1(D284N)       | 764.4                     | 164.3 |
| 40 | D1-T18              | T25-D1(D284N)       | 361.4                     | 163.4 |
| 41 | T18-zip             | T25-D1(D284N)       | 44.0                      | 21.8  |
| 42 | T18 vector          | T25-D1(D284N)       | 17.1                      | 5.5   |
| 43 | D1(L103F)-T18       | T25-zip             | 15.7                      | 7.9   |
| 44 | D1(L103F)-T18       | T25-D1              | 460.8                     | 266.6 |
| 45 | D1(L103F)-T18       | T25-D1(L103F)       | 557.7                     | 105.8 |
| 46 | D1-T18              | T25-D1(L103F)       | 659.4                     | 128.5 |
| 47 | T18-zip             | T25-D1(L103F)       | 51.5                      | 36.6  |
| 48 | T18 vector          | T25-D1(L103F)       | 52.7                      | 12.7  |
| 49 | D1(S104L)-T18       | T25-zip             | 13.1                      | 14.8  |
| 50 | D1(S104L)-T18       | T25-D1              | 553.9                     | 99.9  |
| 51 | D1(S104L)-T18       | T25-D1(S104L)       | 767.4                     | 177.6 |
| 52 | D1-T18              | T25-D1(S104L)       | 369.5                     | 49.0  |
| 53 | T18-zip             | T25-D1(S104L)       | 20.8                      | 24.3  |
| 54 | T18 vector          | T25-D1(S104L)       | 14.1                      | 13.4  |

<sup>a</sup> $\beta$ -galactosidase activity (Miller units) of wild-type *lacZ* in *cyA E.coli*



**Table S2.** Dimerization of NodD1 mutants. *cya E. coli* BTH101 was co-transformed with plasmids expressing the indicated T18- and T25-NodD1 fusions. Six colonies from each co-transformation were patched onto minimal maltose medium (left) and assayed for cAMP-dependent  $\beta$ -galactosidase activity (right). D1 is wild-type NodD1; mutations in NodD1 give rise to the residues in parentheses. Data is presented as mean +/- SD from a representative assay.

## REFERENCES

1. **Egelhoff TT, Fisher RF, Jacobs TW, Mulligan JT, Long SR.** 1985. Nucleotide sequence of *Rhizobium meliloti* 1021 nodulation genes: *nodD* is read divergently from *nodABC*. *DNA* **4**:241-248.
2. **Burn J, Rossen L, Johnston AWB.** 1987. Four classes of mutations in the *nodD* gene of *Rhizobium leguminosarum* biovar *viciae* that affect its ability to autoregulate and/or activate other *nod* genes in the presence of flavonoid inducers. *Genes Dev.* **1**:456-464.
3. **Burn JE, Hamilton WD, Wootton JC, Johnston AWB.** 1989. Single and multiple mutations affecting properties of the regulatory gene *nodD* of *Rhizobium*. *Mol. Microbiol.* **3**:1567-1577.
4. **McIver J, Djordjevic MA, Weinman JJ, Bender GL, Rolfe BG.** 1989. Extension of host range of *Rhizobium leguminosarum* bv. *trifolii* caused by point mutations in *nodD* that result in alterations in regulatory function and recognition of inducer molecules. *Mol. Plant-Microbe Interact.* **2**:97-106.
5. **Smirnova IA, Dian C, Leonard GA, McSweeney S, Birse D, Brzezinski P.** 2004. Development of a bacterial biosensor for nitrotoluenes: the crystal structure of the transcriptional regulator DntR. *J Mol Biol* **340**:405-418.
6. **Schell MA, Brown PH, Raju S.** 1990. Use of saturation mutagenesis to localize probable functional domains in the NahR protein, a LysR-type transcription activator. *J. Biol. Chem.* **265**:3844-3850.
7. **Cebolla A, Sousa C, de Lorenzo V.** 1997. Effector specificity mutants of the transcriptional activator NahR of naphthalene degrading *Pseudomonas* define protein sites involved in binding of aromatic inducers. *J. Biol. Chem.* **272**:3986-3992.
8. **Jorgensen C, Dandanell G.** 1999. Isolation and characterization of mutations in the Escherichia coli regulatory protein XapR. *J Bacteriol* **181**:4397-4403.
9. **Monferrer D, Tralau T, Kertesz MA, Dix I, Sola M, Uson I.** 2010. Structural studies on the full-length LysR-type regulator TsaR from Comamonas

- testosteroni T-2 reveal a novel open conformation of the tetrameric LTTR fold. *Mol Microbiol* **75**:1199-1214.
10. **Monferrer D, Tralau T, Kertesz MA, Panjekar S, Uson I.** 2008. High crystallizability under air-exclusion conditions of the full-length LysR-type transcriptional regulator TsaR from *Comamonas testosteroni* T-2 and dataset analysis for a MIRAS structure-solution approach. *Acta Crystallogr Sect F Struct Biol Cryst Commun* **64**:764-769.
  11. **Cho K, Winans SC.** 1993. Altered-function mutations in the *Agrobacterium tumefaciens* OccR protein and in an OccR-regulated promoter. *J. Bacteriol.* **175**:7715-7719.
  12. **Akakura R, Winans SC.** 2002. Constitutive mutations of the OccR regulatory protein affect DNA bending in response to metabolites released from plant tumors. *J. Biol. Chem.* **277**:5866-5874.
  13. **Bartowsky E, Normark S.** 1991. Purification and mutant analysis of *Citrobacter freundii* AmpR, the regulator for chromosomal AmpC beta-lactamase. *Mol. Microbiol.* **5**:1715-1725.
  14. **Bartowsky E, Normark S.** 1993. Interactions of wild-type and mutant AmpR of *Citrobacter freundii* with target DNA. *Mol. Microbiol.* **10**:555-565.
  15. **Choi H, Kim S, Mukhopadhyay P, Cho S, Woo J, Storz G, Ryu S.** 2001. Structural basis of the redox switch in the OxyR transcription factor. *Cell* **105**:103-113.
  16. **Kullik I, Stevens J, Toledano MB, Storz G.** 1995. Mutational analysis of the redox-sensitive transcriptional regulator OxyR: regions important for DNA binding and multimerization. *J. Bacteriol.* **177**:1285-1291.
  17. **Kullik I, Toledano MB, Tartaglia LA, Storz G.** 1995. Mutational analysis of the redox-sensitive transcriptional regulator OxyR: regions important for oxidation and transcriptional activation. *J. Bacteriol.* **177**:1275-1284.
  18. **Dangel AW, Gibson JL, Janssen AP, Tabita FR.** 2005. Residues that influence *in vivo* and *in vitro* CbbR function in *Rhodobacter sphaeroides* and identification of a specific region critical for co-inducer recognition. *Mol Microbiol* **57**:1397-1414.
  19. **Craven SH, Ezezika OC, Haddad S, Hall RA, Momany C, Neidle EL.** 2009. Inducer responses of BenM, a LysR-type transcriptional regulator from *Acinetobacter baylyi* ADP1. *Mol Microbiol* **72**:881-894.
  20. **Ezezika OC, Haddad S, Neidle EL, Momany C.** 2007. Oligomerization of BenM, a LysR-type transcriptional regulator: structural basis for the aggregation of proteins in this family. *Acta Crystallogr Sect F Struct Biol Cryst Commun* **63**:361-368.
  21. **Bykowski T, van der Ploeg JR, Iwanicka-Nowicka R, Hryniewicz MM.** 2002. The switch from inorganic to organic sulphur assimilation in *Escherichia coli*: adenosine 5'-phosphosulphate (APS) as a signalling molecule for sulphate excess. *Mol Microbiol* **43**:1347-1358.
  22. **Stec E, Witkowska-Zimny M, Hryniewicz MM, Neumann P, Wilkinson AJ, Brzozowski AM, Verma CS, Zaim J, Wysocki S, Bujacz GD.** 2006. Structural basis of the sulphate starvation response in *E. coli*: crystal structure and

- mutational analysis of the cofactor-binding domain of the Cbl transcriptional regulator. *J Mol Biol* **364**:309-322.
23. **Colyer TE, Kredich NM.** 1996. *In vitro* characterization of constitutive CysB proteins from *Salmonella typhimurium*. *Mol. Microbiol.* **21**:247-256.
  24. **Hanahan D.** 1985. Techniques for transformation of *E. coli*, p. 109-114. *In* Glover D (ed.), *DNA Cloning, A Practical Approach*, vol. 1. IRL Press, Oxford.
  25. **Meade HM, Long SR, Ruvkun GB, Brown SE, Ausubel FM.** 1982. Physical and genetic characterization of symbiotic and auxotrophic mutants of *Rhizobium meliloti* induced by transposon Tn5 mutagenesis. *J. Bacteriol.* **149**:114-122.
  26. **Honma M, Ausubel F.** 1987. *Rhizobium meliloti* has three functional copies of the *nodD* symbiotic regulatory gene. *Proc. Natl. Acad. Sci USA* **84**:8558-8562.
  27. **Karimova G, Pidoux J, Ullmann A, Ladant D.** 1998. A bacterial two-hybrid system based on a reconstituted signal transduction pathway. *Proc Natl Acad Sci U S A* **95**:5752-5756.
  28. **Yeh K, Wu S, Murphy J, Lagarias J.** 1997. A cyanobacterial phytochrome two-component light sensory system. *Science* **277**:1505-1508.
  29. **Vieira J, Messing J.** 1987. Production of single stranded plasmid DNA. *Meth. Enzymol.* **153**:3-11.
  30. **Ogawa J, Long SR.** 1995. The *Rhizobium meliloti groELc* locus is required for regulation of early *nod* genes by the transcription activator NodD. *Genes Dev.* **9**:714-729.
  31. **Yeh KC, Peck MC, Long SR.** 2002. Luteolin and GroESL modulate *in vitro* activity of NodD. *J. Bacteriol.* **184**:525-530.
  32. **Figurski DH, Helinski DR.** 1979. Replication of an origin-containing derivative of plasmid RK2 dependent on a plasmid function provided in trans. *Proc Natl Acad Sci U S A* **76**:1648-1652.
  33. **Wells DH, Long SR.** 2002. The *Sinorhizobium meliloti* stringent response affects multiple aspects of symbiosis. *Mol Microbiol* **43**:1115-1127.
  34. **Fisher RF, Egelhoff TT, Mulligan JT, Yelton MM, Long SR.** 1988. *Rhizobium meliloti* NodD binds to DNA sequences upstream of inducible nodulation genes., p. 391-398. *In* Boethe H, de Bruijn FJ, Newton WE (ed.), *Nitrogen fixation: hundred years after*. Gustav Fischer, New York.
  35. **Egelhoff TT.** 1987. Molecular analysis of *Rhizobium meliloti* nodulation genes and gene products. Ph. D. thesis. Stanford University, Stanford, CA.
